# Supplementary material for: Homologous Transcription Factors DUX4 and DUX4c Associate with Cytoplasmic Proteins during Muscle Differentiation
Source: PubMed Central journal article supplement (PMC4729438; doi:10.1371/journal.pone.0146893), 2016-01-27
Supplement: pone.0146893.s014.pdf [file pone.0146893.s014.pdf]

**S1Table. Primer sequences**

| #                                  | Orient. | Primer sequence                                                  |
|------------------------------------|---------|------------------------------------------------------------------|
| <i>Yeast-Two-Hybrid constructs</i> |         |                                                                  |
| DUX1                               | F       | 5' CGGAATTC <u>CGGTTCTGGTTCTGGT</u> TCCCCGTGTCAGTCCGTGAAATTCC 3' |
| DUX1                               | R       | 5' TTCTGCAGCATTGGGGCTGCATTGCAC 3'                                |
| DUX1H1                             | F       | 5' CGGAATTC <u>CGGTTCTGGTTCTGGT</u> TCCCCGTGTCAGTCCGTGAAATTCC 3' |
| DUX1H1                             | R       | 5' TTCTGCAGACAGGGCCGAGATTGCCGC 3'                                |
| DUX1H2                             | F       | 5' CGGAATTC <u>CGGTTCTGGTTCTGGT</u> AACCCGCAAAAAGGCAGAC 3'       |
| DUX1H2                             | R       | 5' TTCTGCAGCATTGGGGCTGCATTGCAC 3'                                |
| DUX4                               | F       | 5' CGGAATTC <u>CGGTTCTGGTTCTGGT</u> TCGCGTCCGTCCGTGAAATTCC 3'    |
| DUX4                               | R       | 5' TTGGATTCATCACCGGGCCTAGACCTAGAA 3'                             |
| DUX4H1                             | F       | 5' CGGAATTC <u>CGGTTCTGGTTCTGGT</u> TCGCGTCCGTCCGTGAAATTCC 3'    |
| DUX4H1                             | R       | 5' TTCTGCAGGGGCCAGGGCCGAGATTCC 3'                                |
| DUX4H2                             | F       | 5' CGGAATTC <u>CGGTTCTGGTTCTGGT</u> AGACGCGGCCCGCCAGAAG 3'       |
| DUX4H2                             | R       | 5' TTCTGCAGGGCGACCCACGAGGGAGCAG 3'                               |
| DUX4t                              | F       | 5' CGCAATTC <u>CGGTTCTGGTTCTGGT</u> AGTCACCCTGCTCCCTCGT 3'       |
| DUX4t                              | R       | 5' TTGGATTCATCACCGGGCCTAGACCTAGAA 3'                             |
| DUX4c                              | F       | 5' CGGTT <u>CGGTTCTGGTTCTGGT</u> TCGCGTCCGTCCGTGAAATTCC 3'       |
| DUX4c                              | R       | 5' CGGAATTCAGAGCGGGCTCTTCCAC 3'                                  |
| DUX4ct                             | F       | 5' CGGAATTC <u>CGGTTCTGGTTCTGGT</u> AGTCACCCTGCTCCCTCGT 3'       |
| DUX4ct                             | R       | 5' CGCGGATCCCAGAGCGGGCTCTTCCAC 3'                                |
| <i>pENTR1A-DUX4c construct</i>     |         |                                                                  |
| DUX4c                              | F       | 5' CACCATGGCCCTCCCGACACCCT 3'                                    |
| DUX4c                              | R       | 5' ATAGTTTAGCGCCGCTGGTGTCTACAGGAGCTCAT 3'                        |
| <i>HaloTag constructs</i>          |         |                                                                  |
| DUX4c                              | F       | 5' ATATGCGATCGCCATGGCCCTCCCGACACCCTCC 3'                         |
| DUX4c                              | R       | 5' ACGCGTTTAAACCAGGAGCTCATATAACAGGCTGGAGGTG 3'                   |
| DUX4                               | F       | 5' GGCTGCGATCGCCATGGCCCTCCCGACACCCTC 3'                          |
| DUX4                               | R       | 5' GTCGGTTTAAACAAGCTCCTCCAGCAGAGCCC 3'                           |
| DUX4term                           | F       | 5' TAAAGCGATCGCCATGCAAGGCATCCCGGCGCC 3'                          |
| DUX4term                           | R       | 5' GTCGGTTTAAACAAGCTCCTCCAGCAGAGCCC 3'                           |
| EGFP                               | F       | 5' AGGAGCGATCGCCATGGTGAGCAAGGGCGAGGAG 3'                         |
| EGFP                               | R       | 5' ATGGGTTTAAACCTTGACAGCTCGTCCATGCCG 3'                          |

Underlined: a sequence encoding a GSGSG peptide was introduced between the two parts of the hybrid construct to act as a flexible arm; this would allow the construct to avoid steric hindrance and allow optimal protein folding. All constructs were verified by DNA sequencing. t : tail
