# Supplementary material for: Homologous Transcription Factors DUX4 and DUX4c Associate with Cytoplasmic Proteins during Muscle Differentiation
Source: PubMed Central journal article supplement (PMC4729438; doi:10.1371/journal.pone.0146893), 2016-01-27
Supplement: pone.0146893.s017.pdf [file pone.0146893.s017.pdf]

**Supplemental Table 4**

| Uniprot ID | Function                                   | DUX4                          | DUX4   | Gene ontology function                          | Gene ontology ID         |
|------------|--------------------------------------------|-------------------------------|--------|-------------------------------------------------|--------------------------|
|            |                                            | human myoblasts               | HEK293 |                                                 |                          |
| Uniprot ID | Actin-associated protein                   | number of identified peptides |        | Gene ontology function                          | Gene ontology ID         |
| Q13885     | Tubulin beta-2A chain                      | 2                             | 0      | microtubule family cytoskeletal protein         | PC00157                  |
| P07437     | Tubulin beta chain                         | 18                            | 16     | microtubule family cytoskeletal protein         | PC00157                  |
| P35580     | Myosin-10                                  | 0                             | 16     | actin-binding motor protein                     | PC00040                  |
| P63261     | <sup>¶</sup> Actin, cytoplasmic 2          | 9                             | 0      | actin and actin related protein                 | PC00039                  |
| P21333     | Filamin-A                                  | 7                             | 0      | actin cytoskeleton                              | GO:0015629               |
| Q13509     | Tubulin beta-3 chain                       | 2                             | 1      | microtubule family cytoskeletal protein         | PC00157                  |
| P14649     | Myosin light chain 6B                      | 4                             | 1      | actin cytoskeleton                              | GO:0015629               |
| Q9BUF5     | Tubulin beta-6 chain                       | 2                             | 0      | microtubule family cytoskeletal protein         | PC00157                  |
| P08670     | Vimentin                                   | 11                            | 3      | intermediate filament                           | PC00129                  |
| Q14204     | Cytoplasmic dynein 1 heavy chain 1         | 5                             | 3      | microtubule family cytoskeletal activity        | PC00157                  |
| P35579     | <sup>¶</sup> Myosin heavy chain 9          | 41                            | 10     | actin-binding motor protein                     | PC00040                  |
| P06748     | <sup>¶</sup> Nucleophosmin                 | 2                             | 5      | Organelle organization<br>RNA metabolic process | GO:0006996<br>GO:0016070 |
| P84077     | <sup>§</sup> ADP-ribosylation factor 1     | 2                             | 0      | Organelle organization<br>hydrolase activity    | GO:0006996<br>GO:0016787 |
|            | <b>RNP complex</b>                         |                               |        |                                                 |                          |
| P46781     | <sup>&amp;¶</sup> 40S ribosomal protein S9 | 2                             | 0      | ribonucleoprotein complex                       | GO:0030529               |
| P62753     | 40S ribosomal protein S6                   | 2                             | 0      | ribonucleoprotein complex                       | GO:0030529               |
| P62847     | 40S ribosomal protein S24                  | 2                             | 1      | ribonucleoprotein complex                       | GO:0030529               |
| P62917     | <sup>¶</sup> 60S ribosomal protein L8      | 2                             | 1      | ribonucleoprotein complex                       | GO:0030529               |
| P62750     | <sup>¶</sup> 60S ribosomal protein L23a    | 2                             | 1      | ribonucleoprotein complex                       | GO:0030529               |

|         |                                     |   |   |                           |            |
|---------|-------------------------------------|---|---|---------------------------|------------|
| P62081  | 40S ribosomal protein S7            | 0 | 2 | ribonucleoprotein complex | GO:0030529 |
| P61247  | 40S ribosomal protein S3a           | 4 | 2 | ribonucleoprotein complex | GO:0030529 |
| P62906  | 60S ribosomal protein L10a          | 3 | 2 | ribonucleoprotein complex | GO:0030529 |
| P32969  | 60S ribosomal protein L9            | 3 | 2 | ribonucleoprotein complex | GO:0030529 |
| P62244  | 40S ribosomal protein S15a          | 3 | 2 | ribonucleoprotein complex | GO:0030529 |
| P62841  | 40S ribosomal protein S15           | 2 | 2 | ribonucleoprotein complex | GO:0030529 |
| P84098  | 60S ribosomal protein L19           | 2 | 2 | ribonucleoprotein complex | GO:0030529 |
| P46776  | 60S ribosomal protein L27a          | 1 | 2 | ribonucleoprotein complex | GO:0030529 |
| P46783  | 40S ribosomal protein S10           | 1 | 2 | ribonucleoprotein complex | GO:0030529 |
| P60866  | 40S ribosomal protein S20           | 1 | 2 | ribonucleoprotein complex | GO:0030529 |
| P62249  | 40S ribosomal protein S16           | 0 | 2 | ribonucleoprotein complex | GO:0030529 |
| P15880  | 40S ribosomal protein S2            | 2 | 2 | ribonucleoprotein complex | GO:0030529 |
| P62899  | 60S ribosomal protein L31           | 2 | 2 | ribonucleoprotein complex | GO:0030529 |
| P62829  | 60S ribosomal protein L23           | 2 | 2 | ribonucleoprotein complex | GO:0030529 |
| P62269  | 40S ribosomal protein S18           | 4 | 4 | ribonucleoprotein complex | GO:0030529 |
| P26373  | 60S ribosomal protein L13           | 4 | 4 | ribonucleoprotein complex | GO:0030529 |
| P62241  | 40S ribosomal protein S8            | 4 | 4 | ribonucleoprotein complex | GO:0030529 |
| P62888  | 60S ribosomal protein L30           | 3 | 4 | ribonucleoprotein complex | GO:0030529 |
| P62263  | 40S ribosomal protein S14           | 3 | 4 | ribonucleoprotein complex | GO:0030529 |
| P62277  | 40S ribosomal protein S13           | 3 | 4 | ribonucleoprotein complex | GO:0030529 |
| P18621  | 60S ribosomal protein L17           | 2 | 4 | ribonucleoprotein complex | GO:0030529 |
| P36578  | 60S ribosomal protein L4            | 1 | 4 | ribonucleoprotein complex | GO:0030529 |
| P62851  | 40S ribosomal protein S25           | 3 | 3 | ribonucleoprotein complex | GO:0030529 |
| Q9Y3U8  | 60S ribosomal protein L36           | 3 | 3 | ribonucleoprotein complex | GO:0030529 |
| P62424  | 60S ribosomal protein L7a           | 2 | 3 | ribonucleoprotein complex | GO:0030529 |
| P18124  | 60S ribosomal protein L7            | 6 | 5 | ribonucleoprotein complex | GO:0030529 |
| P39023  | 60S ribosomal protein L3            | 6 | 4 | ribonucleoprotein complex | GO:0030529 |
| P62701  | 40S ribosomal protein S4, X isoform | 5 | 3 | ribonucleoprotein complex | GO:0030529 |
| P300050 | 60S ribosomal protein L12           | 4 | 3 | ribonucleoprotein complex | GO:0030529 |

|        |                                                                      |   |    |                                                                             |                                                         |
|--------|----------------------------------------------------------------------|---|----|-----------------------------------------------------------------------------|---------------------------------------------------------|
| P27635 | 60S ribosomal protein L10                                            | 4 | 3  | ribonucleoprotein complex                                                   | GO:0030529                                              |
| Q07020 | 60S ribosomal protein L18                                            | 1 | 3  | ribonucleoprotein complex                                                   | GO:0030529                                              |
| P61313 | <sup>¶</sup> 60S ribosomal protein L15                               | 1 | 2  | ribonucleoprotein complex                                                   | GO:0030529                                              |
| P46778 | 60S ribosomal protein L21                                            | 1 | 2  | ribonucleoprotein complex                                                   | GO:0030529                                              |
| P42766 | <sup>¶</sup> 60S ribosomal protein L35                               | 2 | 3  | ribonucleoprotein complex                                                   | GO:0030529                                              |
| P35268 | <sup>¶</sup> 60S ribosomal protein L22                               | 2 | 3  | ribonucleoprotein complex                                                   | GO:0030529                                              |
| P23396 | <sup>&amp;¶</sup> 40S ribosomal protein S3                           | 6 | 4  | ribonucleoprotein complex                                                   | GO:0030529                                              |
| POCW22 | 40S ribosomal protein S17-like                                       | 5 | 3  | ribonucleoprotein complex                                                   | GO:0030529                                              |
| Q02878 | <sup>¶</sup> 60S ribosomal protein L6                                | 1 | 3  | ribonucleoprotein complex                                                   | GO:0030529                                              |
|        | <b>Transcription-related protein</b>                                 |   |    |                                                                             |                                                         |
| Q6NZI2 | Polymerase I and transcript release factor                           | 4 | 0  | transcription cofactor                                                      | PC00218                                                 |
| P09429 | High mobility group protein B1                                       | 2 | 0  | transcription cofactor                                                      | PC00218                                                 |
| Q9BQG0 | <sup>¶</sup> Myb-binding protein 1A                                  | 0 | 2  | transcription factor                                                        | PC00218                                                 |
| Q86VP6 | Cullin-associated NEDD8-dissociated protein 1                        | 0 | 3  | transcription factor                                                        | PC00218                                                 |
| P67809 | Nuclease-sensitive element-binding protein 1                         | 4 | 5  | regulation of transcription                                                 | GO:0006355                                              |
| Q12906 | <sup>&amp;¶</sup> Interleukin enhancer-binding factor 3, ILF3        | 0 | 3  | transcription factor<br>immune system process                               | PC00218<br>GO:0002376                                   |
|        | <b>RNA processing</b>                                                |   |    |                                                                             |                                                         |
| A8K651 | <sup>*#¶</sup> Complement component 1 Q subcomponent-binding protein | 7 | 11 | apoptotic process, mRNA processing,<br>immune response, ribosome biogenesis | GO:0006915,<br>GO:0006397,<br>GO:0006955,<br>GO:0042254 |
| Q00839 | <sup>&amp;</sup> Heterogeneous nuclear ribonucleoprotein U           | 4 | 8  | mRNA processing                                                             | GO:0006397                                              |

|        |                                                                       |   |    |                                              |                          |
|--------|-----------------------------------------------------------------------|---|----|----------------------------------------------|--------------------------|
| O75643 | U5 small nuclear ribonucleoprotein 200 kDa helicase                   | 0 | 6  | mRNA processing via spliceosome              | GO:0000398               |
| P52272 | Heterogeneous nuclear ribonucleoprotein M                             | 2 | 5  | mRNA processing                              | GO:0006397               |
| Q9NZI8 | <sup>&amp;¶</sup> Insulin-like growth factor 2 mRNA-binding protein 1 | 0 | 4  | mRNA processing                              | GO:0006397               |
| Q6P2Q9 | Pre-mRNA-processing-splicing factor 8                                 | 5 | 3  | mRNA processing                              | GO:0006397               |
| P52597 | Heterogeneous nuclear ribonucleoprotein F                             | 1 | 3  | mRNA processing                              | GO:0006397               |
| O00425 | <sup>&amp;¶</sup> Insulin-like growth factor 2 mRNA-binding protein 3 | 0 | 2  | mRNA processing                              | GO:0006397               |
| P61978 | Heterogeneous nuclear ribonucleoprotein K                             | 0 | 2  | mRNA processing                              | GO:0006397               |
| P84103 | <sup>§</sup> Serine/arginine-rich splicing factor 3                   | 1 | 3  | mRNA processing via spliceosome              | GO:0000398               |
| Q32P51 | Heterogeneous nuclear ribonucleoprotein A1-like 2                     | 0 | 3  | mRNA processing                              | GO:0006397               |
| O75533 | Splicing factor 3B subunit 1                                          | 0 | 3  | mRNA processing                              | GO:0006397               |
| Q13310 | <sup>¶</sup> Polyadenylate-binding protein 4                          | 0 | 4  | RNA processing                               | GO:0006396               |
| P19338 | <sup>&amp;</sup> Nucleolin                                            | 4 | 14 | developmental process<br>ribosome biogenesis | GO:0032502<br>GO:0042254 |
|        | <b>Helicase</b>                                                       |   |    |                                              |                          |
| P33993 | DNA replication licensing factor MCM7                                 | 0 | 2  | helicase activity                            | GO:0004386               |
| Q9H2U1 | Probable ATP-dependent RNA helicase DHX36                             | 0 | 2  | helicase activity                            | GO:0004386               |
| Q08211 | <sup>&amp;</sup> ATP-dependent RNA helicase A DHX9                    | 9 | 10 | helicase activity                            | GO:0004386               |
| Q7L2E3 | Putative ATP-dependent RNA helicase DHX30                             | 3 | 5  | helicase activity                            | GO:0004386               |

|        |                                                         |   |   |                   |            |
|--------|---------------------------------------------------------|---|---|-------------------|------------|
| Q9NR30 | Nucleolar RNA helicase 2                                | 1 | 4 | helicase activity | GO:0004386 |
| P12956 | <sup>¶</sup> X-ray repair cross-complementing protein 6 | 3 | 3 | helicase activity | GO:0004386 |
| O00571 | ATP-dependent RNA helicase DDX3X                        | 2 | 3 | helicase activity | GO:0004386 |
| P17844 | <sup>¶</sup> Probable ATP-dependent RNA helicase DDX5   | 1 | 3 | helicase activity | GO:0004386 |

|        |                                                            |   |    |                             |            |
|--------|------------------------------------------------------------|---|----|-----------------------------|------------|
|        | <b>Translation</b>                                         |   |    |                             |            |
| P13639 | Elongation factor 2                                        | 0 | 2  | translation factor activity | GO:0008135 |
|        | <b>Metabolic processes</b>                                 |   |    |                             |            |
| P49327 | Fatty acid synthase                                        | 2 | 10 | metabolic process           | GO:0008152 |
| P11586 | C-1-tetrahydrofolate synthase, cytoplasmic                 | 0 | 4  | metabolic process           | GO:0008152 |
| P36542 | ATP synthase subunit gamma, mitochondrial                  | 1 | 3  | metabolic process           | GO:0008152 |
| P07814 | <sup>§</sup> Bifunctional glutamate/proline--tRNA ligase   | 0 | 3  | metabolic process           | GO:0008152 |
| P05141 | ADP/ATP translocase 2                                      | 0 | 3  | metabolic process           | GO:0008152 |
| Q15029 | 116 kDa U5 small nuclear ribonucleoprotein component       | 2 | 2  | metabolic process           | GO:0008152 |
| P31943 | <sup>&amp;</sup> Heterogeneous nuclear ribonucleoprotein H | 1 | 2  | metabolic process           | GO:0008152 |
| O15067 | Phosphoribosylformylglycinamide synthase                   | 0 | 2  | metabolic process           | GO:0008152 |
| P00338 | <sup>¶</sup> L-lactate dehydrogenase A chain               | 4 | 1  | metabolic process           | GO:0008152 |
| P06733 | Alpha-enolase                                              | 0 | 6  | metabolic process           | GO:0008152 |
|        | <b>Endocytosis</b>                                         |   |    |                             |            |
| Q00610 | <sup>¶</sup> Clathrin heavy chain 1                        | 2 | 3  | vesicle mediated transport  | GO:0006897 |
| P53621 | Coatamer subunit alpha                                     | 4 | 1  | vesicle mediated transport  | GO:0006897 |

|        |                                                                                                |   |   |                                                          |            |
|--------|------------------------------------------------------------------------------------------------|---|---|----------------------------------------------------------|------------|
| O95782 | AP-2 complex subunit alpha-1                                                                   | 2 | 0 | vesicle mediated transport                               | GO:0006897 |
|        | <b>Molecule transport</b>                                                                      |   |   |                                                          |            |
| P21796 | Voltage-dependent anion-selective channel protein 1                                            | 0 | 3 | voltage-gated ion channel                                | PC00241    |
| P45880 | <sup>¶</sup> Voltage-dependent anion-selective channel protein 2                               | 0 | 2 | transporter activity                                     | GO:0005215 |
| Q00325 | Phosphate carrier protein, mitochondrial                                                       | 2 | 2 | transporter                                              | PC00227    |
| P12236 | ADP/ATP translocase 3                                                                          | 2 | 0 | transporter activity                                     | GO:0005215 |
|        | <b>Protein transport</b>                                                                       |   |   |                                                          |            |
| O14617 | AP-3 complex subunit delta-1                                                                   | 1 | 2 | intracellular protein transport                          | GO:0006886 |
| P55060 | Exportin-2                                                                                     | 0 | 2 | transporter activity                                     | GO:0005215 |
|        | <b>Additional enzymatic function</b>                                                           |   |   |                                                          |            |
| P13010 | X-ray repair cross-complementing protein 5                                                     | 2 | 6 | double-strand break repair via nonhomologous end joining | GO:0006303 |
| P09874 | Poly [ADP-ribose] polymerase 1                                                                 | 0 | 5 | ligase activity                                          | GO:0003909 |
| P14618 | <sup>¶</sup> Pyruvate kinase PKM                                                               | 6 | 4 | glycolytic process                                       | GO:0006096 |
| P41250 | Glycine--tRNA ligase                                                                           | 0 | 4 | aminoacyl-tRNA synthetase                                | PC00047    |
| P17987 | <sup>§</sup> T-complex protein 1 subunit alpha                                                 | 0 | 3 | chaperone                                                | PC00072    |
| P41252 | <sup>§</sup> Isoleucine--tRNA ligase, cytoplasmic                                              | 0 | 3 | aminoacyl-tRNA ligase activity                           | GO:0004812 |
| P11940 | <sup>&amp;¶</sup> Polyadenylate-binding protein 1                                              | 4 | 2 | developmental process                                    | GO:0032502 |
| P40227 | <sup>§</sup> T-complex protein 1 subunit zeta                                                  | 0 | 2 | chaperone                                                | PC00072    |
| P56192 | <sup>§</sup> Methionine--tRNA ligase, cytoplasmic                                              | 0 | 2 | aminoacyl-tRNA synthetase                                | PC00047    |
| P34897 | Serine hydroxymethyltransferase, mitochondrial                                                 | 0 | 2 | transferase activity                                     | GO:0016749 |
| P30153 | <sup>¶</sup> Serine/threonine-protein phosphatase 2A 65 kDa regulatory subunit A alpha isoform | 0 | 2 | phosphoprotein phosphatase activity                      | GO:0004721 |

|        |                                                                          |    |   |                                 |            |
|--------|--------------------------------------------------------------------------|----|---|---------------------------------|------------|
| P46940 | Ras GTPase-activating-like protein IQGAP1                                | 12 | 0 | small GTPase regulator activity | GO:0005083 |
| P62826 | <sup>§</sup> GTP-binding nuclear protein Ran                             | 2  | 0 | hydrolase activity              | GO:0016787 |
| P04843 | Dolichyl-diphosphooligosaccharide--protein glycosyltransferase subunit 1 | 2  | 0 | transferase activity            | GO:0016740 |
| P17655 | Calpain-2 catalytic subunit                                              | 2  | 0 | hydrolase activity              | GO:0016787 |
| P04406 | Glyceraldehyde-3-phosphate dehydrogenase                                 | 2  | 0 | oxidoreductase activity         | GO:0016491 |
| P10809 | 60 kDa heat shock protein, mitochondrial                                 | 0  | 7 | protein binding                 | GO:0005515 |
| P78527 | DNA-dependent protein kinase catalytic subunit                           | 2  | 7 | protein kinase activity         | GO:0004672 |

Display options: Exclusive Unique Peptide Count, No filter selected for Req Mods

Scaffold Viewer settings summary: protein threshold 95%, min # peptides 2, peptide threshold 95%

Note: desmin, Interleukin enhancer binding factor 2 (ILF2), DDX17 and peroxiredoxin are not mentioned as only one peptide was identified.

\*Identified as a putative DUX4-binding partner using yeast two-hybrid (see table 3)

<sup>¶</sup>Identified (or highly similar) as a putative DUX4 binding partner using HaloTag co-purification (see S3 Table)

<sup>§</sup>Isoform (or similar function) identified in other approaches (see other tables)

# Validated interaction by co-immunoprecipitation in HEK293 cells

&Known to be associated in an IGF2BP1-dependent mRNP complex

Any peptide of the proteins identified were found in the different controls made in parallel (non-specific binding peptides purified following incubation of Glutathione Sepharose 4B with total protein lysate without addition of GST-DUX4), except for tubulin beta-chain (8 peptides found with HEK293 lysate but no peptide found with myoblast lysate); actin 2 (8 peptides found with myoblast lysate but no peptide found with HEK293 lysate); C1QBP, alpha-enolase and 60 kDa heat shock protein (1 peptide found with HEK293 lysate alone but no peptide found with myoblast lysate); and myosin 9, vimentin and Ribosomal Protein P2 (1 peptide found with myoblast lysate but no peptide found with HEK293 lysate).
