# Supplementary material for: Homologous Transcription Factors DUX4 and DUX4c Associate with Cytoplasmic Proteins during Muscle Differentiation
Source: PLoS One. 2016 Jan 27;11(1):e0146893. doi: 10.1371/journal.pone.0146893 (PMC4729438; doi:10.1371/journal.pone.0146893)
Supplement: S3 Table — (PDF) [file pone.0146893.s016.pdf]

**S3 Table. DUX4 partners identified by HaloTag co-purification in human TE671 and LHCN-M2**

| HaloTag fusion protein                                        |                                                                                                                                 | DUX4<br>1-424                 | DUX4term<br>349-424 | DUX4c<br>1-374 |
|---------------------------------------------------------------|---------------------------------------------------------------------------------------------------------------------------------|-------------------------------|---------------------|----------------|
| Function                                                      |                                                                                                                                 | number of identified peptides |                     |                |
| Cytoskeletal organization (GO0006996: organelle organization) |                                                                                                                                 |                               |                     |                |
| Uniprot nb                                                    | Actin and actin-associated proteins                                                                                             |                               |                     |                |
| Q9BTI9                                                        | * <sup>†</sup> NPM1, nucleophosmin                                                                                              | 21 (C)                        |                     |                |
| F8W7K3                                                        | *SPTAN1 spectrin alpha-chain, subunit of fodrin                                                                                 | 17 (C)                        |                     |                |
| D6W5C0                                                        | *SPTBN1 Spectrin, beta-chain, subunit of fodrin                                                                                 | 6 (C)                         |                     |                |
| Q53SB5                                                        | Desmin, isoform CRA_a                                                                                                           | 14 (C)                        |                     |                |
| Q13707                                                        | <sup>†</sup> Actin, ACTA2 protein                                                                                               |                               |                     | 5 (N)          |
| Q6UYC3                                                        | Lamin A/C, LMNA<br>Only peptides common to lamin A and C were identified                                                        | 5 (C)                         |                     |                |
| Q1HE25                                                        | Actinin alpha 1 isoform b, ACTN1                                                                                                | 2 (C)                         |                     |                |
| B4DM97                                                        | *highly similar to α-centractin/ARP1                                                                                            | 2 (C)                         |                     |                |
| F8WCF6                                                        | *ARPC4 (actin-related protein 2/3 complex, subunit 4) and TTLL3 (tubulin tyrosine ligase-like family, member 3), fusion protein | 2 (C)                         |                     |                |
| Q6FI97                                                        | Actin-Like 6A/ARP4                                                                                                              | 2(C)                          |                     |                |
| Q5T0I2                                                        | Gelsolin, GSN                                                                                                                   | 2 (C)                         |                     |                |
| Q60FE2                                                        | <sup>†</sup> MYH9 (non-muscle MHC-IIA) variant protein                                                                          | 9 (C)                         |                     |                |
| B7Z6Z4                                                        | MYL6                                                                                                                            |                               | 1(C)                |                |
| F2Z2D5                                                        | POF1B, non-muscle                                                                                                               | 4 (C)                         |                     |                |
| Q53R15                                                        | MYL1, myosin, light chain 1                                                                                                     | 2 (C)                         | 3 (C)               |                |
| Q5VU72                                                        | Tropomyosin 3, TPM3, non-muscle                                                                                                 | 2 (C)                         |                     |                |
| B5BU28                                                        | CTNNB1, Catenin beta 1                                                                                                          | 4 (C)                         |                     |                |
| E7ETZ0                                                        | CALM1, calmodulin                                                                                                               | 3 (C)                         |                     |                |
| Q9BRL5                                                        | CALM3, calmodulin                                                                                                               |                               | 2 (C)               |                |
| Q5VXV3                                                        | SET                                                                                                                             | 2(C)                          |                     |                |
| C9JPM4                                                        | §ADP-Ribosylation Factor 41, ARF4                                                                                               | 2(C)                          |                     | 2(C)           |
| Microtubule-associated and centrosomes organization           |                                                                                                                                 |                               |                     |                |
| Q9H2R7                                                        | * Nuclear Distribution Protein, NUDC                                                                                            | 2(C)                          |                     |                |
| A4D177                                                        | Chromobox homolog 3, CBX3                                                                                                       | 2(C)                          |                     |                |
| B5MDF5                                                        | GTP-binding nuclear protein RAN                                                                                                 | 5(C)                          |                     |                |
| Q06S70                                                        | *TREX2                                                                                                                          | 2(C)                          |                     |                |
| * NPM1, ARP1, fodrin and Catenin beta 1                       |                                                                                                                                 | see above*                    |                     |                |
| protein folding (GO:0006457)                                  |                                                                                                                                 |                               |                     |                |
|                                                               | Actin and tubulin folding                                                                                                       |                               |                     |                |
| F5H282                                                        | <sup>§</sup> Chaperonin containing TCP1 subunit alpha, CCTA                                                                     | 5 (C)                         |                     | 3 (C)          |
| B7ZAT2                                                        | TCP1, subunit beta, isoform                                                                                                     | 2 (C)                         |                     |                |
| F8VQ14                                                        | TCP1, subunit beta, CCT2                                                                                                        |                               |                     | 7 (C)          |
| Q5SZY0                                                        | TCP1 subunit gamma, CCT3                                                                                                        | 7 (C)                         |                     | 5 (C)          |
| F5H5W3                                                        | TCP1 subunit delta, CCT4                                                                                                        | 4 (C)                         |                     |                |

|                                      |                                                                                           |             |       |       |
|--------------------------------------|-------------------------------------------------------------------------------------------|-------------|-------|-------|
| B7Z9L0                               | TCP1 subunit delta, CCT4                                                                  |             |       | 5 (C) |
| A8K2X8                               | highly similar to TCP1 subunit epsilon, CCT5                                              |             |       | 5 (C) |
| B4DDU6                               | highly similar to TCP 1 subunit epsilon                                                   | 3 (C)       |       |       |
| Q59ET3                               | TCP1 subunit 6A isoform a variant                                                         | 3 (C)       |       |       |
| Q53HV2                               | <sup>§</sup> TCP1 subunit eta variant                                                     | 4 (C)       |       |       |
| Q6IBT3                               | TCP1 subunit eta, CCT7                                                                    |             |       | 3 (C) |
| Q7Z759                               | TCP1 subunit theta, CCT8                                                                  | 7 (C)       |       |       |
| Q53HU0                               | TCP1 subunit theta variant                                                                |             |       | 7 (C) |
|                                      | <b>Others</b>                                                                             |             |       |       |
| Q5CAQ5                               | HSP90B1, Heat Shock Protein 90 kDa Beta (Grp94), Member 1                                 | 18 (C)      |       | 9 (C) |
| Q53RC7                               | disulfide isomerase family A, member 6, isoform                                           | 8 (C)       |       |       |
| B4DQ50                               | highly similar to Protein-glutamine gamma-glutamyltransferase E                           | 2(C)        |       |       |
| <b>RNA-associated proteins</b>       |                                                                                           |             |       |       |
|                                      | <b>Transcriptional regulation</b>                                                         |             |       |       |
| Q86VG2                               | *SFPQ, Splicing factor proline/glutamine-rich**                                           | 8 (C)       |       | 3 (N) |
| F5GYZ3                               | NONO, Non-POU Domain Containing, Octamer-Binding1**                                       | 2 (C)       |       |       |
| B5BUE6                               | * <sup>¶</sup> DDX5, DEAD box polypeptide 5                                               | 6 (C)       |       | 4 (C) |
| Q59F66                               | *DDX17, DEAD box polypeptide 17 isoform p82 variant                                       | 2 (C)       |       |       |
| Q6FHQ0                               | RBBP4/ RbAp48**                                                                           | 3 (C)       |       |       |
| Q6FHQ0                               | RBBP7**                                                                                   | 4 (C)       |       |       |
| F4ZW66                               | &* <sup>¶</sup> ILF3, Interleukin enhancer-binding factor 2 variant (90 kDa NFAT subunit) | 5 (C)       |       |       |
| Q53FG3                               | &* <sup>¶</sup> ILF2 (45 kDa NFAT subunit)                                                | 2 (C)       |       |       |
| B3KRS5                               | HDAC2**                                                                                   | 2 (C)       |       |       |
| Q59EB5                               | *CSDA protein variant                                                                     | 5 (C)       |       |       |
|                                      | <b>Splicing regulation</b>                                                                |             |       |       |
| B2R8Z8                               | &Similar to SYNCRIP, hnRNP Q                                                              | 7 (C)       |       |       |
| Q8TBR3                               | &FUS, hnRNP P2                                                                            | 3 (C)       |       | 1 (N) |
| B4DZZ1                               | MYBBP1 nucleolar transcriptional regulator                                                | 2 (C)       |       |       |
| A8K651                               | * <sup>¶</sup> C1QBP, p32 subunit of splicing factor 2 (SF2)                              | 5 (C)       |       | 2 (N) |
| B4DUA4                               | <sup>§</sup> SRSF5, Serine/arginine-rich-splicing factor 5                                | 2 (C)       |       |       |
| Q49AN9                               | SNRPG, small nuclear ribonucleoprotein G (snRNP)                                          | 2 (C)       |       |       |
| *SFPQ, NONO, DDX5, DDX17, NMP1, NFAT |                                                                                           | * See above |       |       |
|                                      | <b>RNA stability</b>                                                                      |             |       |       |
| Q6IQ30                               | <sup>¶</sup> PABPC4, Poly(A)-binding protein 4                                            | 14 (C)      |       |       |
| E7ERJ7                               | & <sup>¶</sup> PABPC1, Poly(A)-binding protein 1                                          |             | 4 (C) |       |
| B3KT93                               | highly similar to Poly(A)-binding protein 1                                               | 14 (C)      |       |       |
| Q53SS8                               | PCBP1, Poly(RC)-binding protein 1, hnRNP E1/X                                             | 7 (C)       | 1 (C) | 2 (C) |
| Q6IPF4                               | &PCBP2, Poly(RC)-binding protein 2, hnRNP E2                                              | 5 (C)       |       | 3 (C) |

|                                          |                                                                                   |             |  |       |
|------------------------------------------|-----------------------------------------------------------------------------------|-------------|--|-------|
| B4DVB8                                   | &*Similar to ELAV-like 1                                                          | 3 (C)       |  |       |
| *NFAT                                    |                                                                                   | * See above |  |       |
|                                          | mRNA and mRNP granules export to the cytoplasm,                                   |             |  |       |
| C9JT33                                   | &¶IGF2BP1, IGF2 mRNA-binding protein 1                                            | 5(C)        |  |       |
| D3DTW3                                   | &IGF2BP1, IGF2 mRNA-binding protein 1, isoform CRA                                | 7 (C)       |  |       |
| *NFAT, DDX5, FUS, SFPQ, NONO, TREX2, RAN |                                                                                   | * See above |  |       |
|                                          | Translational regulation                                                          |             |  |       |
| A8K7F6                                   | highly similar to EIF4A1, eukaryotic translation initiation factor 4A, isoform 1  | 2 (C)       |  | 6 (C) |
| Q53HK3                                   | EIF2, Eukaryotic translation initiation factor 2, subunit 3 gamma, 52 kDa variant | 5 (C)       |  |       |
| Q96G38                                   | EIF3B, Eukaryotic translation initiation factor 3, subunit beta                   | 4 (C)       |  |       |
| Q5U0F4                                   | EIF3I, Eukaryotic translation initiation factor 3, subunit 2 beta, 36 kDa         | 4 (C)       |  |       |
| Q6IAM0                                   | EIF3S4, Eukaryotic translation initiation factor 3 subunit G                      | 4 (C)       |  |       |
| Q24JU4                                   | EIF3A, Eukaryotic translation initiation factor 3, subunit A                      | 3 (C)       |  |       |
| F5H425                                   | EIF3J                                                                             | 3 (C)       |  |       |
| B3KXU8                                   | *Highly similar to CAPRIN 1, Cell Cycle-Associated Protein 1                      | 3 (C)       |  |       |
| E9PD14                                   | *GNB2L1, Guanine Nucleotide-Binding Protein (G Protein), Beta Polypeptide 2-Like  |             |  | 3 (C) |
| *CSDA protein variant, IGF2BP1           |                                                                                   | *See above  |  |       |
|                                          | Ribosome biogenesis                                                               |             |  |       |
| Q3KQS4                                   | *NOP2 nucleolar protein                                                           | 2 (C)       |  |       |
| *NPM1, DDX5, DDX17, C1BPQ, MYBBP1A       |                                                                                   | *See above  |  |       |
|                                          | Ribosomal proteins                                                                |             |  |       |
| Q6NXR8                                   | &¶Ribosomal protein S3A                                                           | 9(C)        |  |       |
| Q9NY85                                   | ¶Ribosomal protein L3 (Fragment)                                                  | 8(C)        |  |       |
| A9C4C1                                   | &¶Ribosomal protein S9                                                            | 5(C)        |  |       |
| Q5T8U4                                   | ¶Ribosomal protein L7a                                                            | 7(C)        |  |       |
| E5RI99                                   | ¶Uncharacterized protein GN=RPL30                                                 | 8(C)        |  |       |
| E7EQV9                                   | ¶Ribosomal protein L15                                                            | 4(C)        |  |       |
| B7Z4K2                                   | ¶Ribosomal protein L31, isoform CRA_c                                             | 4(C)        |  |       |
| A8MUD9                                   | ¶Uncharacterized protein GN=RPL7                                                  | 3(C)        |  |       |
| B2R4D8                                   | ¶60S ribosomal protein L27                                                        | 5(C)        |  |       |
| Q96IR1                                   | &¶RPS4X protein (Fragment)                                                        | 2(C)        |  | 2(C)  |
| E9PKZ0                                   | ¶Uncharacterized protein GN=RPL8                                                  | 3(C)        |  |       |
| Q59GY2                                   | ¶Ribosomal protein L4 variant (Fragment)                                          | 3(C)        |  |       |
| Q5JR94                                   | &¶40S ribosomal protein S8                                                        | 2(C)        |  |       |
| Q9HBB3                                   | ¶60S ribosomal protein L6                                                         | 2(C)        |  |       |
| Q53G25                                   | Ribosomal protein S5 variant (Fragment)                                           | 2(C)        |  |       |
| Q53G83                                   | ¶Ribosomal protein S3 variant (Fragment)                                          | 2(C)        |  | 5(C)  |
| A8MUS3                                   | ¶Ribosomal protein L23a, isoform CRA_a                                            | 2(C)        |  |       |
| Q5VVD0                                   | Ribosomal protein L11                                                             | 3(C)        |  |       |
| Q59FS3                                   | ¶Ribosomal protein S7 variant (Fragment)                                          | 2(C)        |  |       |
| Q6IPH7                                   | RPL14 protein                                                                     | 2(C)        |  |       |

|                                       |                                                                                             |             |       |       |
|---------------------------------------|---------------------------------------------------------------------------------------------|-------------|-------|-------|
| Q9BSW5                                | RPS2 protein (Fragment)                                                                     |             |       | 2(C)  |
| Q7Z4W8                                | Heparin-binding protein HBp15, Ribosomal protein RPL22                                      | 7(C)        |       |       |
| Q96RS2                                | Ribosomal Protein SA Pseudogene 151, LAMR1P15                                               | 2(C)        |       |       |
| Q5MK14                                | Leukemia-associated protein                                                                 | 2(C)        | 1(C)  |       |
| *GNB2L1                               |                                                                                             | *see above  |       |       |
|                                       | TP53 regulation                                                                             |             |       |       |
| *NPM1, Similar to ELAV-like 1, NOP2   |                                                                                             | *See above  |       |       |
|                                       | Neuronal differentiation                                                                    |             |       |       |
| B5MCE7                                | BZW2, Basic leucine zipper and W2 domains 2, isoform CRA_b                                  | 3 (C)       |       |       |
| Q8N274                                | Similar to AHNK                                                                             | 4 (C)       |       |       |
| B7Z9Y9                                | Weakly similar to Paraneoplastic Ma Antigen 2                                               | 11(C)       |       |       |
| *NFAT, similar to CAPRIN1, NUDC, SFPQ |                                                                                             | *See above  |       |       |
|                                       | other                                                                                       |             |       |       |
| A8K0N0                                | SRP9                                                                                        | 2(C)        |       |       |
| WNT signaling                         |                                                                                             |             |       |       |
| *Catenin beta 1, NFAT, GNB2L1, DDX5   |                                                                                             | * See above |       |       |
| Oxidative stress                      |                                                                                             |             |       |       |
| B2R4P2                                | highly similar to Peroxiredoxin-1                                                           | 8 (C)       | 3 (C) | 4 (C) |
| B4DF70                                | highly similar to Peroxiredoxin-2                                                           | 8 (C)       | 2 (C) | 4 (C) |
| A8MX94                                | GSTP1                                                                                       |             | 3(C)  |       |
| Others                                |                                                                                             |             |       |       |
|                                       | transcription                                                                               |             |       |       |
| P52926                                | §HMGA2                                                                                      | 2(N)        |       | 1(N)  |
| B1AHC7                                | ¶XRCC6                                                                                      | 3(C)        |       |       |
|                                       | translation                                                                                 |             |       |       |
| B4DQY1                                | highly similar to Serine/threonine-protein phosphatase 2A 65 kDa regulatory subunit A alpha | 3(C)        |       |       |
| Q6ZTI3                                | highly similar to Lysyl-tRNA synthetase                                                     | 6(C)        |       |       |
| B4E266                                | highly similar to Leucyl-tRNA synthetase, cytoplasmic                                       | 2(C)        |       |       |
|                                       | proteasome                                                                                  |             |       |       |
| Q6IBM2                                | Proteasome (Prosome, Macropain) Activator Subunit 1, PSME1                                  | 5(C)        |       |       |
| Q05DH1                                | PSMA7                                                                                       | 2(C)        |       | 2(C)  |
| Q6IAT9                                | PSMB6                                                                                       | 2(C)        | 1(C)  |       |
| Q5TZN3                                | UBE2C                                                                                       | 2(C)        |       |       |
| Q5UGI3                                | UBC, ubiquitin C splice variant                                                             |             |       | 2(C)  |
| E9KL27                                | Epididymis tissue protein Li 174                                                            | 2(C)        |       |       |
| B4DXJ9                                | PSMA6                                                                                       | 2(C)        |       |       |
| Q96IF9                                | VCP                                                                                         | 2(C)        |       |       |
|                                       | Extracellular(?), membrane proteins and membrane vesicle trafficking                        |             |       |       |
| B4DIN1                                | §Clathrin light chain A, CLTA                                                               | 3(C)        |       |       |
| B2R4M6                                | highly similar to Homo sapiens S100 calcium-binding protein A9                              | 11(C)       | 2(C)  |       |
|                                       | others                                                                                      |             |       |       |

|        |                                                            |       |      |      |
|--------|------------------------------------------------------------|-------|------|------|
| B4DUU6 | <sup>¶</sup> Pyruvate kinase, PKM                          | 14(C) |      | 8(C) |
| B7Z5E3 | <sup>¶</sup> L-lactate dehydrogenase, LDHA                 | 8(C)  |      | 5(C) |
| Q5U077 | L-lactate dehydrogenase, LDHB                              |       |      | 8(C) |
| Q75MT9 | Malate dehydrogenase, MDH2                                 |       |      | 4(C) |
| Q5SZU1 | Phosphoglycerate dehydrogenase, PHGDH                      |       |      | 2(C) |
| B2R721 | FLJ93240, highly similar to insulin-degrading enzyme (IDE) | 3(C)  |      |      |
| A8K008 | cDNA FLJ78387                                              | 4(C)  |      |      |
| B4DE76 | highly similar to Ran-specific GTPase-activating protein   | 3(C)  |      |      |
| Q6FIG4 | RAB1A                                                      | 2(C)  |      |      |
| Q6FI42 | RAB11B                                                     |       | 3(C) |      |
| C9JQV0 | Uncharacterized Protein C7orf502                           | 6(C)  |      |      |
| B7ZLF8 | Uncharacterized protein, cytoplasmic                       | 4(C)  |      |      |
| Q5EFE6 | Anti-RhD monoclonal T125 kappa light chain                 | 2(C)  |      |      |

Scaffold Viewer settings summary: protein threshold 95%, min # peptides 2, peptide threshold 95%

GO: gene ontology

Any peptide of the proteins identified were found in the control HaloTag-EGFP co-purification.

Table data represent all the identified proteins from 7 co-purifications experiments (2 with HaloTag-DUX4, 4 with HaloTag-DUX4c and 1 with HaloTag-DUX4term realized each time in parallel with the control HaloTag-EGFP). **We always found C1QBP, SFPQ and FUS in each HaloTag-DUX4 or -DUX4c co-purifications.**

We found many peptides from different tubulin forms in each conditions. However, fewer peptides corresponding to conserved regions were found following HaloTag-EGFP co-immunoprecipitation. In contrast, more peptides in non-conserved regions were retrieved following HaloTag-DUX4, -DUX4term or -DUX4c co-immunoprecipitation.

\* Involved in different functions: some are depicted in the table.

\*\*The heterodimers SFPQ/NONO and RBBP4/RBBP7 are involved in transcriptional repression by association with HDAC.

<sup>¶</sup> Identified (or highly similar) as putative DUX4 partner using GST pull-down assays in human myoblasts or HEK293 cells (see S4 Table)

<sup>§</sup> Isoform (or similar function) identified in other approaches (see other tables)

<sup>&</sup> Known to be associated in IGF2BP1-dependent mRNP granules
